# Supplementary material for: Differential construction response to humidity by related species of mound-building termites
Source: Oxford University Press journal article supplement (doi:10.1242/jeb.212274), 2019-01-01
Supplement: jeb212274supp.pdf [file jeb212274supp.pdf]

**Table S1: Statistical output for high and low humidity experiments. (Mean  $\pm$  s.d.)**

|                              | Species               | High Humidity          |                |                          |                               | Low Humidity           |                |                          |                               |
|------------------------------|-----------------------|------------------------|----------------|--------------------------|-------------------------------|------------------------|----------------|--------------------------|-------------------------------|
|                              |                       | Area (m <sup>2</sup> ) | Mass (kg)      | Volume (m <sup>3</sup> ) | Density (kg.m <sup>-3</sup> ) | Area (m <sup>2</sup> ) | Mass (kg)      | Volume (m <sup>3</sup> ) | Density (kg.m <sup>-3</sup> ) |
| <b>Mean</b>                  | <i>M. michaelsoni</i> | 1.493e-03              | 6.83e-03       | 1.209e-05                | 0.61e03                       | 0.866e-03              | 4.87e-03       | 6.82e-06                 | 0.77e03                       |
| <b><math>\pm</math> s.d.</b> |                       | $\pm$ 0.403e-03        | $\pm$ 2.76e-03 | $\pm$ 5.71e-06           | $\pm$ 0.20e03                 | $\pm$ 0.172e-03        | $\pm$ 1.77e-03 | $\pm$ 2.84e-06           | $\pm$ 0.21e03                 |
|                              | <i>M. natalensis</i>  | 1.668e-03              | 9.04e-03       | 1.394e-05                | 0.70e03                       | 1.519e-03              | 7.47e-03       | 1.080e-05                | 0.71e03                       |
|                              |                       | $\pm$ 0.540e-03        | $\pm$ 2.25e-03 | $\pm$ 3.55e-06           | $\pm$ 0.32e03                 | $\pm$ 0.546e-03        | $\pm$ 1.93e-03 | $\pm$ 1.82e-06           | $\pm$ 0.21e03                 |
| <b>p-values</b>              | (permutation)         | 0.450                  | 0.080          | 0.413                    | 0.533                         | 0.001                  | 0.009          | 0.003                    | 0.550                         |

**Table S2: Raw data for all experiments. Upper-case letter indicates colony, prefix letter indicates species.**

| Colony | High Humidity          |           |                          | Low Humidity           |           |                          |
|--------|------------------------|-----------|--------------------------|------------------------|-----------|--------------------------|
|        | Area (m <sup>2</sup> ) | Mass (kg) | Volume (m <sup>3</sup> ) | Area (m <sup>2</sup> ) | Mass (kg) | Volume (m <sup>3</sup> ) |
| m-A1   | 1.708e-03              | 7.70e-03  | 1.76e-05                 | 0.701e-03              | 5.30e-03  | 5.83e-06                 |
| m-A2   | 2.243e-03              | 5.70e-03  | 1.05e-05                 | 0.913e-03              | 4.70e-03  | 9.23e-06                 |
| m-A3   | 1.864e-03              | 6.20e-03  | 6.18e-06                 | 1.053e-03              | 4.30e-03  | 9.07e-06                 |
| m-B1   | 1.360e-03              | 4.80e-03  | 5.44e-06                 | 0.865e-03              | 3.90e-03  | 4.03e-06                 |
| m-B2   | 0.926e-03              | 3.80e-03  | 7.04e-06                 | 0.518e-03              | 1.90e-03  | 1.96e-06                 |
| m-B3   | 1.162e-03              | 3.10e-03  | 8.20e-06                 | 1.025e-03              | 3.30e-03  | 5.70e-06                 |
| m-C1   | 1.178e-03              | 1.00e-02  | 1.63e-05                 | 0.888e-03              | 6.00e-03  | 5.77e-06                 |
| m-C2   | 1.565e-03              | 9.90e-03  | 1.96e-05                 | 0.810e-03              | 7.40e-03  | 9.84e-06                 |
| m-C3   | 1.427e-03              | 1.03e-02  | 1.78e-05                 | 1.018e-03              | 7.00e-03  | 9.95e-06                 |
| n-D1   | 2.735e-03              | 1.19e-02  | 8.03e-06                 | 2.230e-03              | 1.00e-02  | 1.00e-05                 |
| n-D2   | 1.497e-03              | 1.21e-02  | 1.77e-05                 | 1.387e-03              | 9.60e-03  | 1.37e-05                 |
| n-D3   | 2.293e-03              | 1.13e-02  | 1.40e-05                 | 2.426e-03              | 1.00e-03  | 1.02e-05                 |
| n-E1   | 0.905e-03              | 6.50e-03  | 9.97e-06                 | 1.584e-03              | 6.20e-03  | 8.64e-06                 |
| n-E2   | 1.596e-03              | 8.40e-03  | 1.54e-05                 | 1.681e-03              | 6.30e-03  | 1.10e-05                 |
| n-E3   | 1.675e-03              | 9.60e-03  | 1.52e-05                 | 1.387e-03              | 7.30e-03  | 1.22e-05                 |
| n-F1   | 1.531e-03              | 7.30e-03  | 1.14e-05                 | 1.315e-03              | 4.80e-03  | 1.22e-05                 |
| n-F2   | 1.292e-03              | 6.70e-03  | 1.48e-05                 | 0.764e-03              | 7.00e-03  | 7.96e-06                 |
| n-F3   | 1.491e-03              | 7.60e-03  | 1.89e-05                 | 0.900e-03              | 6.00e-03  | 1.11e-05                 |

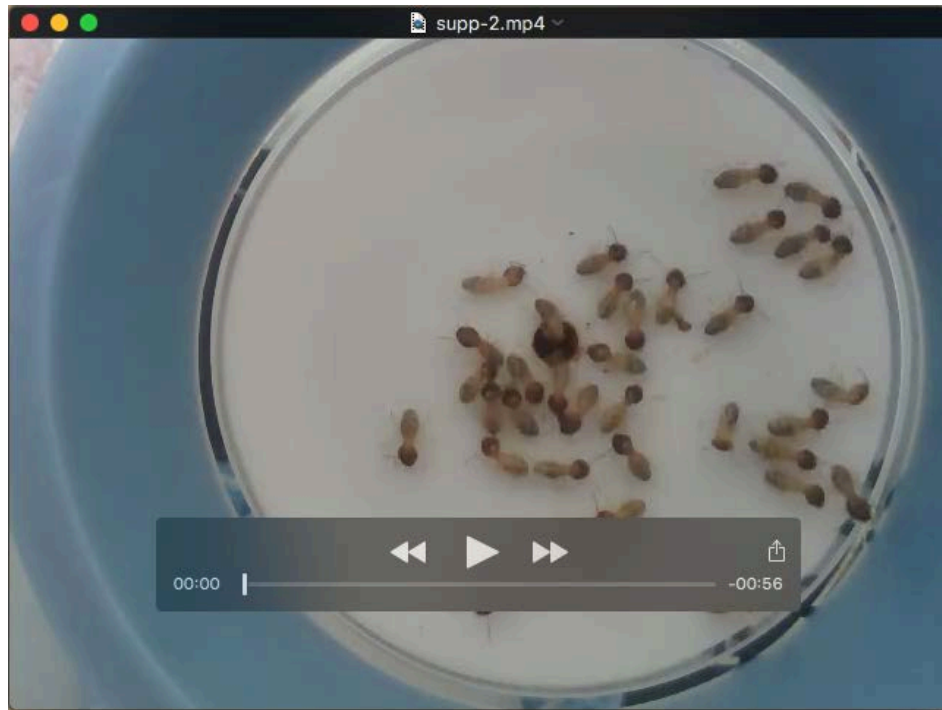

Movie 1. A timelapse video (240x) of 35 *Macrotermes michaelseni* major workers building with soil on a plate at 40% relative humidity over 4 h. The soil reservoir is accessed through a hole at the centre of the otherwise homogeneous plate.
